# Supplementary material for: Head and Neck Cancer Stem Cell-Enriched Spheroid Model for Anticancer Compound Screening
Source: MDPI journal article supplement (doi:10.3390/cells9071707), 2020-07-16
Supplement: s1 [file s1]

Supplementary Materials

Supplementary Figure 1

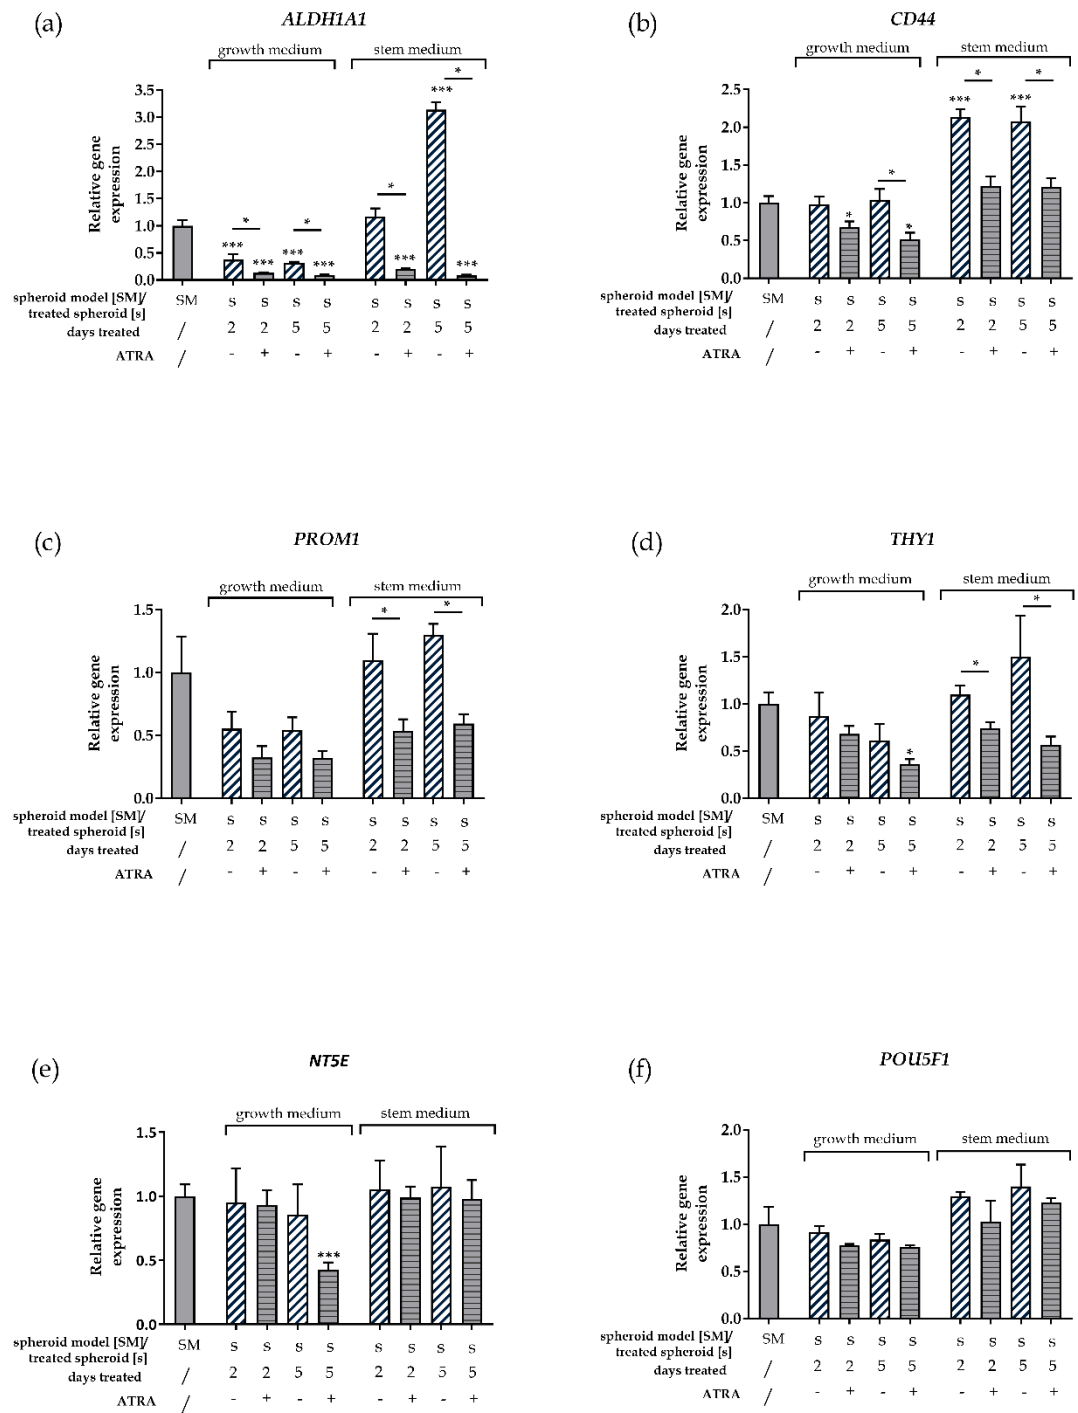

**Figure S1. Relative gene expression of stem markers during optimization of differentiation treatment.** SCESM spheroids were treated with two different media (growth medium  $\pm$  ATRA, stem medium  $\pm$  ATRA) and two different treatment durations (2 and 5 days). Relative gene expression of six stem markers was assessed in untreated 7- days old SCESM spheroids and treated SCESM spheroids. (a) Relative gene expression of *ALDH1A1*; (b) Relative gene expression of *CD44*; (c) Relative gene expression of *PROM1*; (d) Relative gene expression of *THY1*; (e) Relative gene expression of *NT5E*; (f) Relative gene expression of *POU5F1*. Normalized mean values  $\pm$  SE ( $n \geq 5$ ) are presented Asterisks above the graph bars represent the results of statistical analysis of the studied group vs. the control group - SM (\* $p < 0.05$ , \*\*\* $p < 0.001$ ). SM: 7 days old SCESM spheroids; s: treated SCESM spheroids; ). - : control/ATRA untreated group; + : ATRA treated group.
